# Supplementary material for: Knockdown of copper-transporting ATPase 1 (Atp7a) impairs iron flux in fully-differentiated rat (IEC-6) and human (Caco-2) intestinal epithelial cells
Source: Royal Society of Chemistry journal article supplement (doi:10.1039/c6mt00126b), 2016-01-01
Supplement: c6mt00126b1.pdf [file c6mt00126b1.pdf]

1 **Supplemental Figure 1. Verification of Atp7a knockdown in IEC-6 and Caco-2 cells.** IEC-6  
2 and Caco-2 cells were transfected with negative-control (Ctrl) or Atp7a-targeting, shLentiviral  
3 plasmid vectors and two clonal populations, derived from a small number of individual cells,  
4 were selected for with puromycin (KD1 or KD2). Atp7a KD was verified at the protein level in  
5 all cell populations. In both panels, a representative western blot is shown as an inset; 2 other  
6 experiments produced comparable results for both proteins (not shown). Protein expression  
7 values are presented as means  $\pm$  SDs. Data were analyzed by One-way ANOVA followed by  
8 Tukey's post hoc analysis.  $*p<0.05$  and  $**p<0.01$ , as compared to control values.  $n = 3$   
9 independent experiments.

10  
11 **Supplemental Figure 2. Atp7a knockdown in IEC-6 cells alters expression of iron**  
12 **transport-related genes and proteins.** Ctrl and Atp7a KD IEC-6 cells were grown for 8 days  
13 post-confluence, and then total cell lysates were prepared for western blot analysis. In all panels,  
14 a representative western blot is shown as an inset; 2 other experiments produced comparable  
15 results in each case (not shown). Protein expression values are means  $\pm$  SDs. Data were analyzed  
16 by One-way ANOVA followed by Tukey's post hoc analysis.  $*p<0.05$  and  $**p<0.01$ , as  
17 compared to control values.  $n = 3$  independent experiments.

18  
19 **Supplemental Figure 3. Atp7a KD does not alter expression of metallothionein 1a.** mRNA was  
20 purified from fully-differentiated Ctrl or Atp7a KD IEC-6 cells and SYBR-Green qRT-PCR was  
21 performed to quantify expression Mt1a. 200  $\mu\text{mol/L}$  DFO was added to some wells for the last  
22 24 hours to create an iron-deficient condition. No significant changes in expression were noted

- 1 between experimental groups.  $n = 3$  independent experiments with 3 technical replicates per
- 2 experiment.
- 3

Supplemental Figure 1.

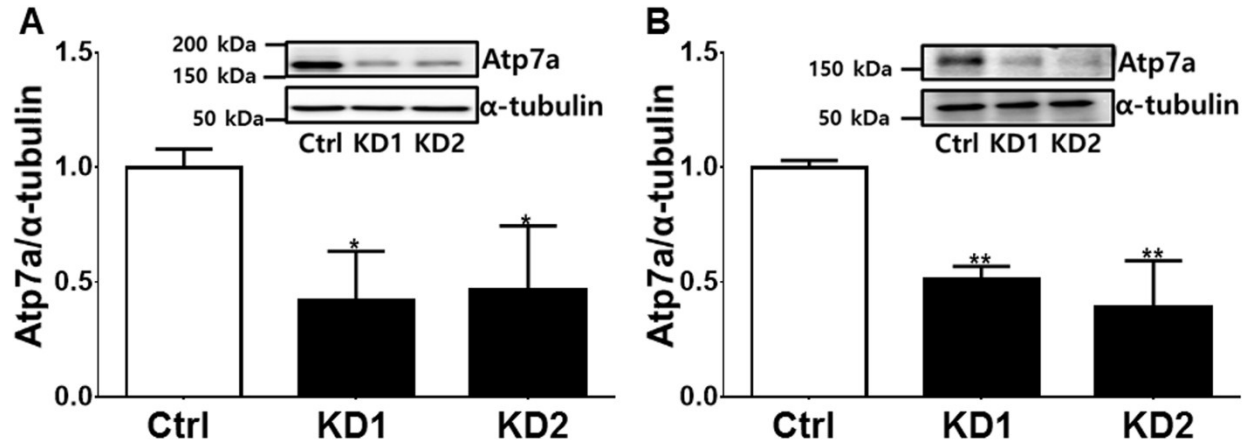

1

Supplemental Figure 2.

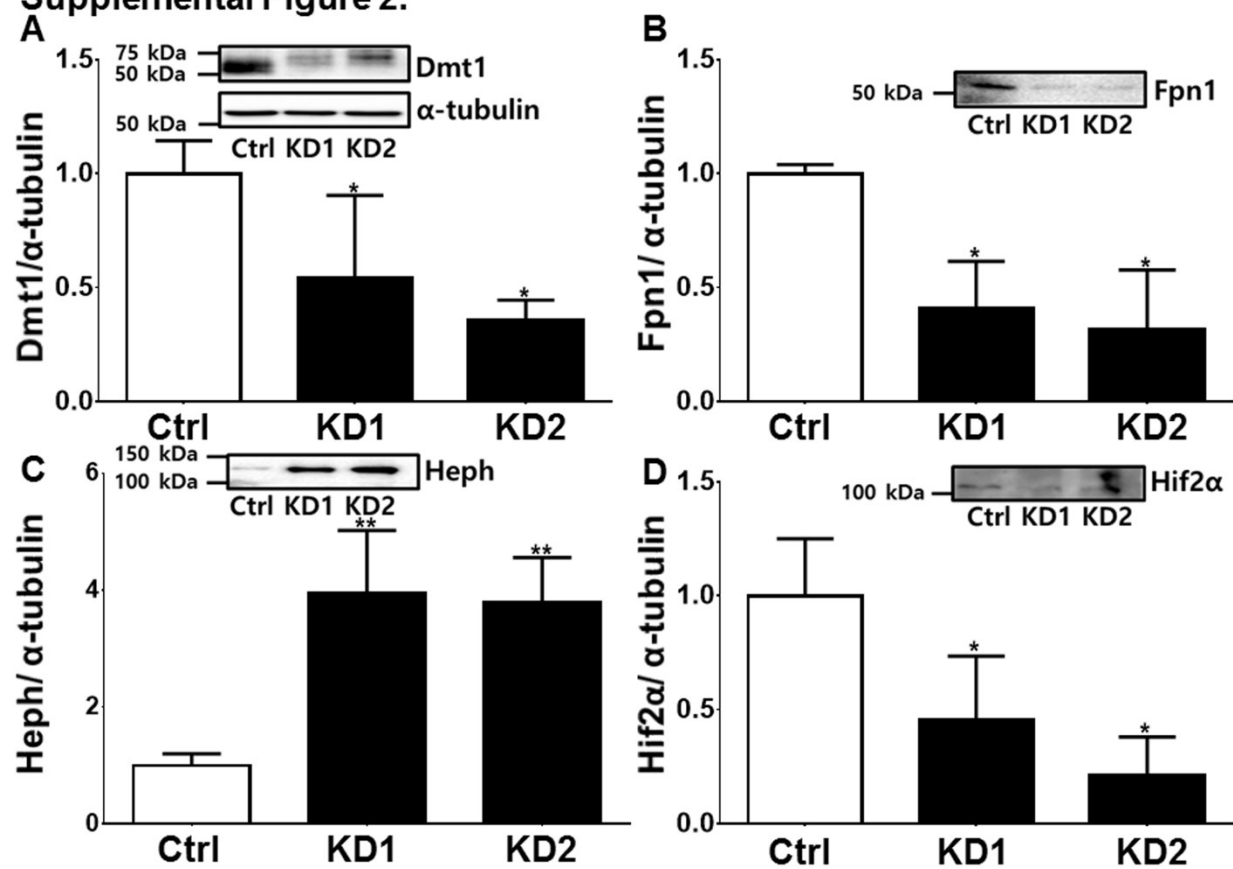

1

### Supplemental Figure 3.

A

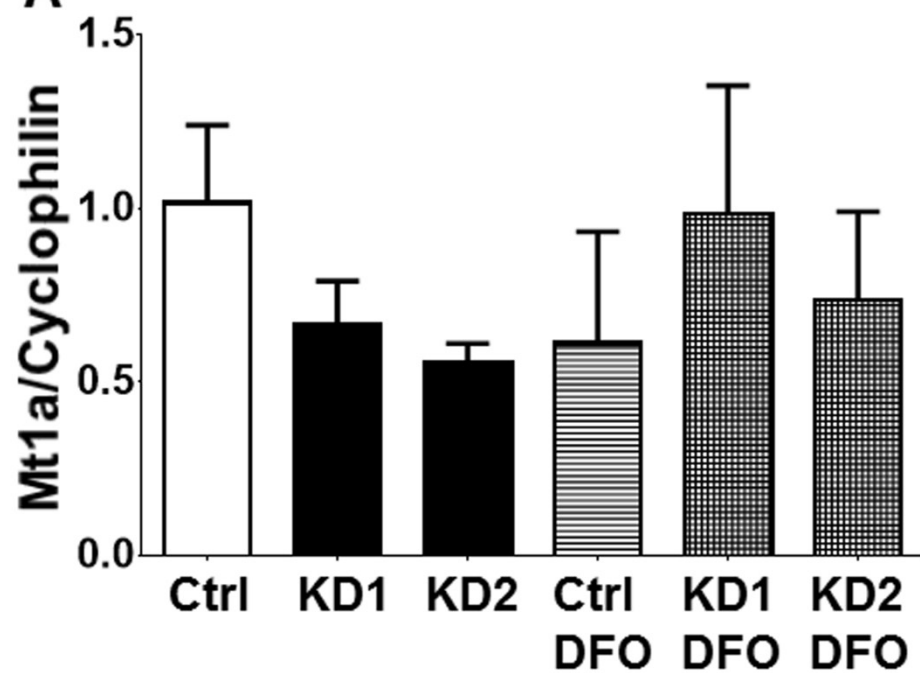

1 **Supplemental Table 1. Sequences of qRT-PCR primers**

2

| Gene        | §F/R | Primer sequence                     |
|-------------|------|-------------------------------------|
| Atp7a       | F    | 5'- TGAACAGTCATCACCTTCATCGTC -3'    |
|             | R    | 5'- GCGATCAAGCCACACAGTTCA -3'       |
| Cyclophilin | F    | 5'- CTTGCTGCAATGGTCAACC -3'         |
|             | R    | 5'- TGCTGTCTTTGGAACCTTGTCTGC -3'    |
| Ctrl        | F    | 5' - AGAAGTCCAGACCTGGTTAGGGATC - 3' |
|             | R    | 5' - TGTGGTTCATCCTCAGGTCC - 3'      |
| Dcytb       | F    | 5'- CGTGTTTGATTATCACAATGTCCG -3'    |
|             | R    | 5'- CACCGTGGCAATCACTGTTCC -3'       |
| Dmt1        | F    | 5'- GCATCTTGGTCCTTCTCGTCTGC -3'     |
|             | R    | 5'- AACACACTGGCTCTGATGGCTCC -3'     |
| Fpn1        | F    | 5'- TCGTAGCAGGAGAAAACAGGAGC -3'     |
|             | R    | 5'- GGAACCGAATGTCATAATCTHGC -3'     |
| Heph        | F    | 5'- ACACTCTACAGCTTCAGGGCATGA -3'    |
|             | R    | 5'- CTGTCAGGGCAATAATCCCATTCT -3'    |
| Mt1a        | F    | 5'- CTTCTTGTCGCTTACACCGTTG-3'       |
|             | R    | 5'- CAGCAGCACTGTTCGTCACTTC-3'       |
| Tfr1        | F    | 5'- ATTGCGGACTGAGGAGGTGC -3'        |
|             | R    | 5'- CCATCATTCCTCAGTTGTACAAGGGAG -3' |
| *hnDcytb    | F    | 5'- CCTCTTTGGAACAGTGATTGCC -3'      |
|             | R    | 5'- GAAGAAGGCTACAGACTTACAGGACA -3'  |
| hnHeph      | F    | 5'- TTCCACGGACAGACACTGAG -3'        |
|             | R    | 5'- TCAATATGGCAGCACCAGCA -3'        |
| hnFpn1      | F    | 5'- TGCAGTGTCTGTGTTTCTGGTGG -3'     |
|             | R    | 5'- ATGTAAGTGCCTCACCTTTAAGTCTGG -3' |

3 §F: forward/R: reverse

4 \*hn: heteronuclear

5

6
